# Supplementary material for: Feasibility of Short-Term Aggressive Lipid-Lowering Therapy with the PCSK9 Antibody in Acute Coronary Syndrome
Source: MDPI journal article supplement (doi:10.3390/jcdd10050204), 2023-05-09
Supplement: s1 [file s1]

## Supplemental materials

**Supplemental table S1. Potential adverse events which were not categorized in primary and secondary outcomes.**

| No. | Age (y) | Sex    | Study group                | Observation period | Details of adverse event              | Causation with PCSK9 Ab treatment | Comments                                                                     |
|-----|---------|--------|----------------------------|--------------------|---------------------------------------|-----------------------------------|------------------------------------------------------------------------------|
| 1   | 73      | Male   | With PCSK9 Ab (Alirocumab) | 1-month            | Eosinophilic gastroenteritis          | Unknown                           |                                                                              |
| 2   | 66      | Male   | With PCSK9 Ab (Evolocumab) | 1-month            | Skin rash                             | None                              | Caused by contrast medium injection                                          |
|     |         |        |                            | 3-month            | Mild CK elevation                     | Unknown                           | CK level < 5 times of the upper limit of normal                              |
| 3   | 77      | Male   | With PCSK9 Ab (Evolocumab) | 1-month            | Serum Cre elevation                   | None                              | Caused by oral ARB                                                           |
| 4   | 84      | Male   | With PCSK9 Ab (Alirocumab) | 12-month           | Hospitalization due to bladder cancer | None                              | Known history of bladder cancer before initiating PCSK9 Ab                   |
| 5   | 77      | Male   | With PCSK9 Ab (Evolocumab) | 12-month           | Worsening of CKD                      | None                              | Worsened at 1 year time point, PCSK9 Ab had already been stopped at 3 months |
| 6   | 71      | Female | Without PCSK9 Ab           | 1-month            | Worsening of HF                       | None (non-PCSK9 Ab group)         | Treated with oral diuretics, Hospitalization (-)                             |
| 7   | 90      | Female | Without PCSK9 Ab           | 1-month            | Worsening of HF                       | None (non-PCSK9 Ab group)         | Treated with oral diuretics, Hospitalization (-)                             |
| 8   | 70      | Male   | Without PCSK9 Ab           | 1-month            | Delayed cardiac tamponade             | None (non-PCSK9 Ab group)         | Due to oozing LV rupture caused by broad anterior MI                         |
|     |         |        |                            | 1-month            | Dry cough                             | None (non-PCSK9 Ab group)         | Caused by oral ACE inhibitor                                                 |
| 9   | 72      | Male   | Without PCSK9 Ab           | 3-month            | Hemorrhagic gastritis                 | None (non-PCSK9 Ab group)         |                                                                              |
| 10  | 48      | Male   | Without PCSK9 Ab           | 3-month            | mild CK elevation                     | None (non-PCSK9 Ab group)         | CK level < 5 times of the upper limit of normal                              |
| 11  | 78      | Male   | Without PCSK9 Ab           | 12-month           | Delirium                              | None (non-PCSK9 Ab group)         |                                                                              |
| 12  | 82      | Female | Without PCSK9 Ab           | 12-month           | Ulcerative colitis                    | None (non-PCSK9 Ab group)         |                                                                              |

|    |    |        |                  |          |                                                   |                           |  |
|----|----|--------|------------------|----------|---------------------------------------------------|---------------------------|--|
| 13 | 73 | Male   | Without PCSK9 Ab | 12-month | Pacemaker implantation due to sick sinus syndrome | None (non-PCSK9 Ab group) |  |
| 14 | 78 | Male   | Without PCSK9 Ab | 12-month | Progression of interstitial pneumonia             | None (non-PCSK9 Ab group) |  |
| 15 | 75 | Female | Without PCSK9 Ab | 12-month | Trauma (Femoral neck fracture)                    | None (non-PCSK9 Ab group) |  |

Abbreviations: Ab=antibody, ACE=angiotensin converting enzyme, ARB=angiotensin receptor blocker, CK=creatinine kinase, CKD=chronic kidney disease, HF=heart failure, LV=left ventricle, MI=myocardial infarction, PCSK9=proprotein convertase subtilisin kexin-9

#### **START-PCSK9 study investigators.**

Investigators involved enrollment of at least 1 patient (124 patients enrolled overall).

Department of Cardiology, Iwata City Hospital: Kazusa Hayashi, Toshimasa Oda, Terumori Sato, Kimito Mizuno, Masataka Maruyama.

Department of Cardiology, Fujinomiya City Hospital: Kazuya Nakamura, Sadanori Takagi, Nobuyuki Wakahara.

Department of Cardiology, Kikugawa City Hospital: Yusuke Shirai, Hiromutsu Tominaga.

Department of Internal Medicine, Enshu Hospital: Daishi Nonaka, Kazuto Ohno.

Department of Cardiology, Shizuoka City Shizuoka Hospital: Hirofumi Sugiyama, Shigetaka Kageyama.

Department of Cardiology, Hamamatsu Red Cross Hospital: Hiroyuki Aoshima, Gaku Matsukura, Takahiro Kanda, Jun Tamura.

Department of Cardiology, Hamamatsu Medical Center: Kohei Sawazaki, Masakazu Kobayashi.

Department of Cardiology, Kosai General Hospital: Mamoru Nobuhara.

Internal Medicine III, Division of Cardiology, Hamamatsu University School of Medicine: Kyoko Unno, Yuichi Suzuki, Yutaro Kaneko, Takenori Ikoma, Keitaro Akita, Tomoaki Sakakibara, Ryota Sato, Keisuke Iguchi, Satoshi Mogi.
